# Supplementary material for: Intensified dominance of El Niño-like convection relevant for global atmospheric circulation variations
Source: Research Square preprint supplement (doi:10.21203/rs.3.rs-5433524/v1), 2024-12-18
Supplement: Supplementary file 1 [file edc9ea53a2ada32607376474.pdf]

**Supplementary Information for**  
**Intensified dominance of El Niño-like convection relevant for global**  
**atmospheric circulation variations**

Fenyng Cai <sup>1,2</sup>, Shuheng Lin <sup>3\*</sup>, Dieter Gerten <sup>1,2</sup>, Song Yang <sup>4,5\*</sup>, Xingwen Jiang <sup>6</sup>,  
Zhen Su <sup>1,7</sup>, and Jürgen Kurths <sup>1,8,9</sup>

<sup>1</sup> Potsdam Institute for Climate Impact Research (PIK), Member of the Leibniz Association,  
P.O. Box 60 12 03 D-14412 Potsdam, Germany

<sup>2</sup> Department of Geography, Humboldt-Universität zu Berlin, 10099 Berlin, Germany

<sup>3</sup> Key Laboratory of Humid Subtropical Eco-geographical Process (Ministry of Education),  
College of Geographical Sciences, Fujian Normal University, 350108 Fuzhou, China

<sup>4</sup> School of Atmospheric Sciences, Sun Yat-sen University, and Southern Marine Science and  
Engineering Guangdong Laboratory (Zhuhai), 519082 Zhuhai, China

<sup>5</sup> Guangdong Province Key Laboratory for Climate Change and Natural Disaster Studies, Sun  
Yat-sen University, 519082 Zhuhai, China

<sup>6</sup> Heavy Rain and Drought-Flood Disasters in Plateau and Basin Key Laboratory of Sichuan  
Province, Institute of Tibetan Plateau Meteorology, China Meteorological Administration,  
Chengdu, Sichuan 610072, China

<sup>7</sup> Department of Computer Science, Humboldt-Universität zu Berlin, 10099 Berlin, Germany

<sup>8</sup> Department of Physics, Humboldt-Universität zu Berlin, 10099 Berlin, Germany

<sup>9</sup> School of Mathematical Sciences, SCMS, and CCSB, Fudan University, 200433 Shanghai,  
China

Submitted to *Nature Climate Change*

November 2024

25    **This PDF file includes:**

26

27    Supplementary Table S1

28    Supplementary Figures S1 to S7

29

30

31 **Table S1 | List of 23 CMIP6 models.**

| <b>Model</b>           | <b>Institution</b>                                                                                             |
|------------------------|----------------------------------------------------------------------------------------------------------------|
| <b>ACCESS-CM2</b>      | Alfred Wegener Institute, Helmholtz Centre for Polar and Marine Research (AWI), Germany                        |
| <b>BCC-CSM2-MR</b>     | Beijing Climate Centre, China                                                                                  |
| <b>CanESM5</b>         | Canadian Centre for Climate Modelling and Analysis, Environment and Climate Change Canada, Canada              |
| <b>CESM-WACCM</b>      | National Centre for Atmospheric Research (NCAR), Climate and Global Dynamics Laboratory, Boulder, USA          |
| <b>EC-Earth3</b>       | EC-Earth consortium, Rossby Center, Swedish Meteorological and Hydrological Institute/SMHI, Norrkoping, Sweden |
| <b>EC-Earth-Veg</b>    |                                                                                                                |
| <b>FOGALS-g3</b>       | Chinese Academy of Sciences, Beijing, China                                                                    |
| <b>GFDL-CM4</b>        | National Oceanic and Atmospheric Administration, Geophysical Fluid Dynamics Laboratory, Princeton, NJ, USA     |
| <b>HadGEM3-GC31-LL</b> | Met Office Hadley Centre, Exeter, UK                                                                           |
| <b>HadGEM3-GC31-MM</b> |                                                                                                                |
| <b>IITM-ESM</b>        | Centre for Climate Change Research<br>Indian Institute of Tropical Meteorology, Pune, India                    |

|                      |                                                                                                                                                                                                                                                 |
|----------------------|-------------------------------------------------------------------------------------------------------------------------------------------------------------------------------------------------------------------------------------------------|
| <b>INM-CM4-8</b>     | Institute for Numerical Mathematics (INM), Russian Academy of Science, Moscow, Russia                                                                                                                                                           |
| <b>INM-CM5-0</b>     |                                                                                                                                                                                                                                                 |
| <b>IPSL-CM6A-LR</b>  | Institute Pierre Simon Laplace (IPSL), Paris, France                                                                                                                                                                                            |
| <b>KACE-1-0-G</b>    | National Institute of Meteorological Sciences/Korea Meteorological Administration, Climate Research Division, Korea                                                                                                                             |
| <b>MIROC6</b>        | Japan Agency for Marine-Earth Science and Technology (JAMSTEC), Atmosphere and Ocean Research Institute (AORI), The University of Tokyo, National Institute for Environmental Studies (NIES), and RIKEN Center for Computational Science, Japan |
| <b>MPI-ESM1-2-HR</b> | Max Planck Institute for Meteorology (MPI-M), Germany                                                                                                                                                                                           |
| <b>MPI-ESM1-2-LR</b> |                                                                                                                                                                                                                                                 |
| <b>MRI-ESM2-0</b>    | Meteorological Research Institute (MRI), Japan                                                                                                                                                                                                  |
| <b>NorESM2-LM</b>    | NorESM Climate Modeling Consortium, Norway                                                                                                                                                                                                      |
| <b>NorESM2-MM</b>    | NorESM Climate Modeling Consortium, Norway                                                                                                                                                                                                      |
| <b>TaiESM1</b>       | Research Center for Environmental Changes, Taiwan, China                                                                                                                                                                                        |
| <b>UKESM1-0-LL</b>   | Met Office Hadley Centre, Exeter, UK                                                                                                                                                                                                            |

32

33

# Networks between anomalous OLR and circulations

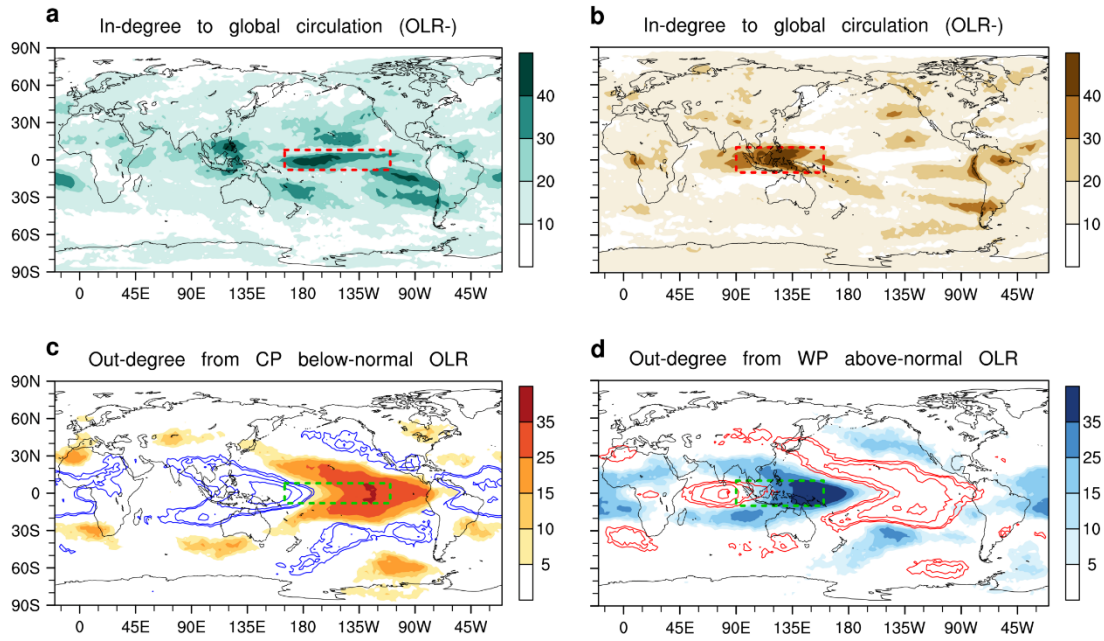

**Figure S1. Degree centrality of relevance for global atmospheric circulation variations and for equatorial Pacific anomalous Outgoing Longwave Radiation (OLR).** The network results are based on pentad-mean ERA5 OLR and geopotential height at 300 hPa during 1979–2022. In-degree centrality to global anomalous pressure events (units:  $\times 10,000$ ) summed for **(a)** two networks based on above-normal convection events, and **(b)** two networks based on below-normal convection events. **(c)** Out-degree centrality from above-normal convection events over the equatorial central Pacific, for high-pressure events (shadings; units:  $\times 1,000$ ) and low-pressure events (blue contours shown at 10,000, 15,000, 25,000, and 35,000). **(d)** Out-degree centrality from below-normal convection events over the equatorial western Pacific, for low-pressure events (shadings; units:  $\times 1,000$ ) and high-pressure events (red contours shown at 10,000, 15,000, 25,000, and 35,000). Equatorial western Pacific ( $10^{\circ}\text{S}$ – $10^{\circ}\text{N}$ ,  $90^{\circ}$ – $160^{\circ}\text{E}$ ) and equatorial central Pacific ( $10^{\circ}\text{S}$ – $10^{\circ}\text{N}$ ,  $170^{\circ}\text{E}$ – $120^{\circ}\text{W}$ ) are outlined by the colored boxes in **(a–d)**.

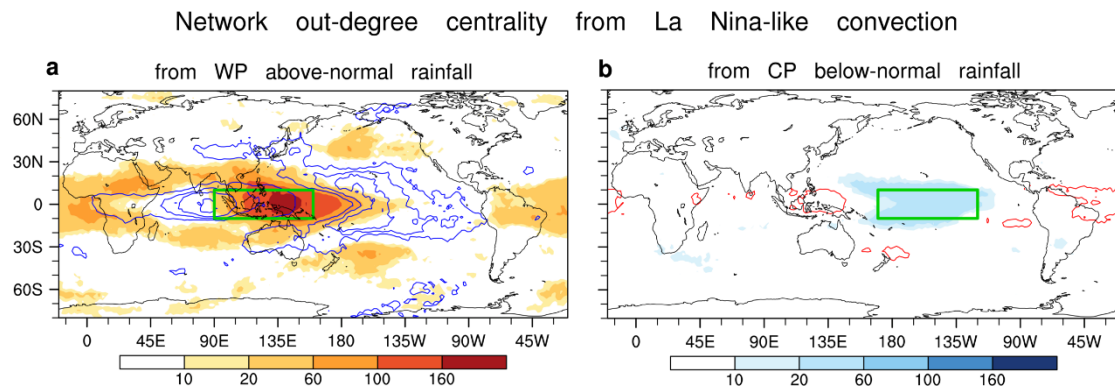

**Figure S2. Atmospheric teleconnections linked to La Niña-like convection revealed**

**by network analysis. (a)** Out-degree centrality from above-normal rainfall events over the equatorial western Pacific (WP), for high-pressure events (shadings; units:  $\times 100$ ) and low-pressure events (blue contours shown at 2,000, 6,000, 12,000, and 16,000). **(b)** Out-degree centrality from below-normal rainfall events over the equatorial central Pacific (CP), for low-pressure events (shadings; units:  $\times 100$ ) and high-pressure events (red contours shown at 2,000, 6,000, 12,000, and 16,000). All plotted shadings and contours in **(a–b)** are significant because only significant links ( $p < 0.01$ ) are retained and used to calculate degree centralities. Equatorial western Pacific ( $10^{\circ}\text{S}$ – $10^{\circ}\text{N}$ ,  $90^{\circ}$ – $160^{\circ}\text{E}$ ) and equatorial central Pacific ( $10^{\circ}\text{S}$ – $10^{\circ}\text{N}$ ,  $170^{\circ}\text{E}$ – $120^{\circ}\text{W}$ ) are outlined by the green boxes in **(a)** and **(b)**, respectively.

# Network out-degree centrality from Indian Ocean convection

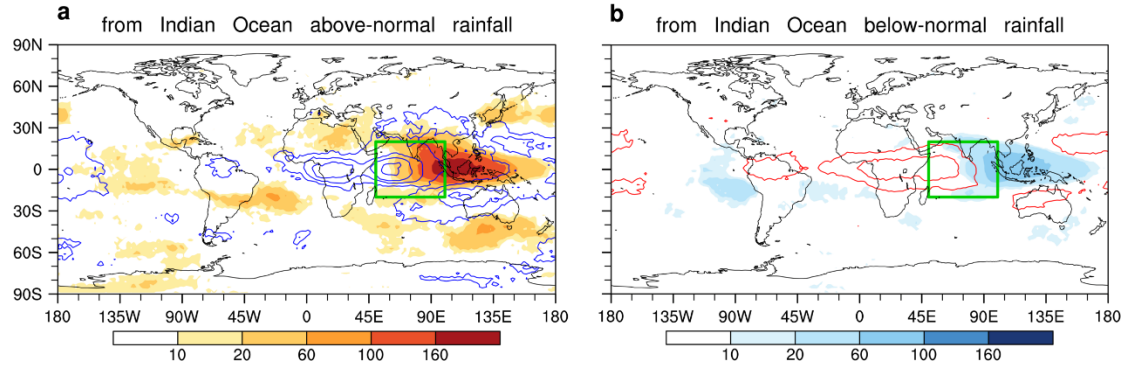

**Figure S3. Atmospheric teleconnections linked to Indian Ocean convection anomalies revealed by network analysis. (a)** Out-degree centrality from above-normal rainfall events over the tropical Indian Ocean, for high-pressure events (shadings; units:  $\times 100$ ) and low-pressure events (blue contours shown at 2,000, 6,000, 12,000, and 16,000). **(b)** Out-degree centrality from below-normal rainfall events over the tropical Indian Ocean, for low-pressure events (shadings; units:  $\times 100$ ) and high-pressure events (red contours shown at 2,000, 6,000, 12,000, and 16,000). All plotted shadings and contours in **(a–b)** are significant because only significant links ( $p < 0.01$ ) are retained and used to calculate degree centralities. Tropical Indian Ocean ( $20^{\circ}\text{S}$ – $20^{\circ}\text{N}$ ,  $50^{\circ}$ – $100^{\circ}\text{E}$ ) is outlined by the green boxes in **(a)** and **(b)**.

# Network out-degree centrality from northern Atlantic convection

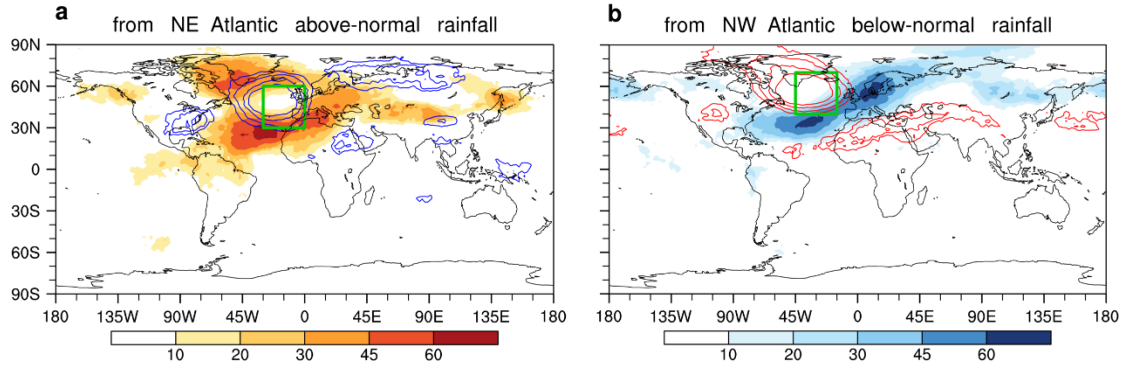

**Figure S4. Atmospheric teleconnections linked to North Atlantic convection anomalies revealed by network analysis. (a)** Out-degree centrality from above-normal rainfall events over the northeastern Atlantic, for high-pressure events (shadings; units:  $\times 100$ ) and low-pressure events (blue contours shown at 2,000, 3,000, 4,500, and 6,000). **(b)** Out-degree centrality from below-normal rainfall events over the northwestern Atlantic, for low-pressure events (shadings; units:  $\times 100$ ) and high-pressure events (red contours shown at 2,000, 3,000, 4,500, and 6,000). All plotted shadings and contours in **(a–b)** are significant because only significant links ( $p < 0.01$ ) are retained and used to calculate degree centralities. Northeastern Atlantic ( $30^{\circ}$ – $60^{\circ}$ N,  $30^{\circ}$ W– $0^{\circ}$ ) and northwestern Atlantic ( $40^{\circ}$ – $70^{\circ}$ N,  $45^{\circ}$ W– $15^{\circ}$ W) are outlined by the green boxes in **(a)** and **(b)**, respectively.



# Historical simulation by 23 models (1979-2014)

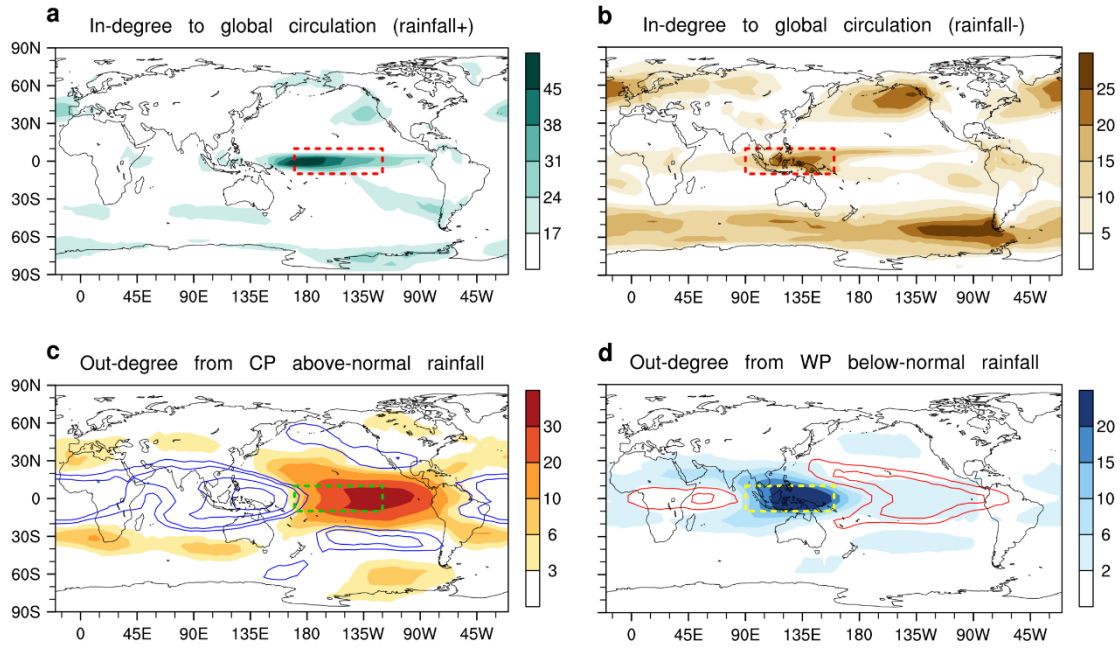

**Figure S5. Degree centrality relevant for global atmospheric circulation variations and for equatorial Pacific anomalous rainfall in CMIP6 historical simulations.** The network results are based on pentad-mean rainfall and geopotential height at 250 hPa in the historical simulations of 23 CMIP6 models during 1979–2014. In-degree centrality to global anomalous pressure events (units:  $\times 1,000$ ) summed for **(a)** two networks based on above-normal rainfall events, and **(b)** two networks based on below-normal rainfall events. **(c)** Out-degree centrality from above-normal rainfall events over the equatorial central Pacific, for high-pressure events (shadings; units:  $\times 100$ ) and low-pressure events (blue contours shown at 800, 1,200, 2,000, and 3,000). **(d)** Out-degree centrality from below-normal rainfall events over the equatorial western Pacific, for low-pressure events (shadings; units:  $\times 100$ ) and high-pressure events (red contours shown at 600, 900, 1,500, and 2,000). Equatorial western Pacific ( $10^{\circ}\text{S}$ – $10^{\circ}\text{N}$ ,  $90^{\circ}$ – $160^{\circ}\text{E}$ ) and equatorial central Pacific ( $10^{\circ}\text{S}$ – $10^{\circ}\text{N}$ ,  $170^{\circ}\text{E}$ – $120^{\circ}\text{W}$ ) are outlined by the colored boxes in **(a–d)**.

Future changes (SSP245 2070-2099 minus Hist 1981-2010)

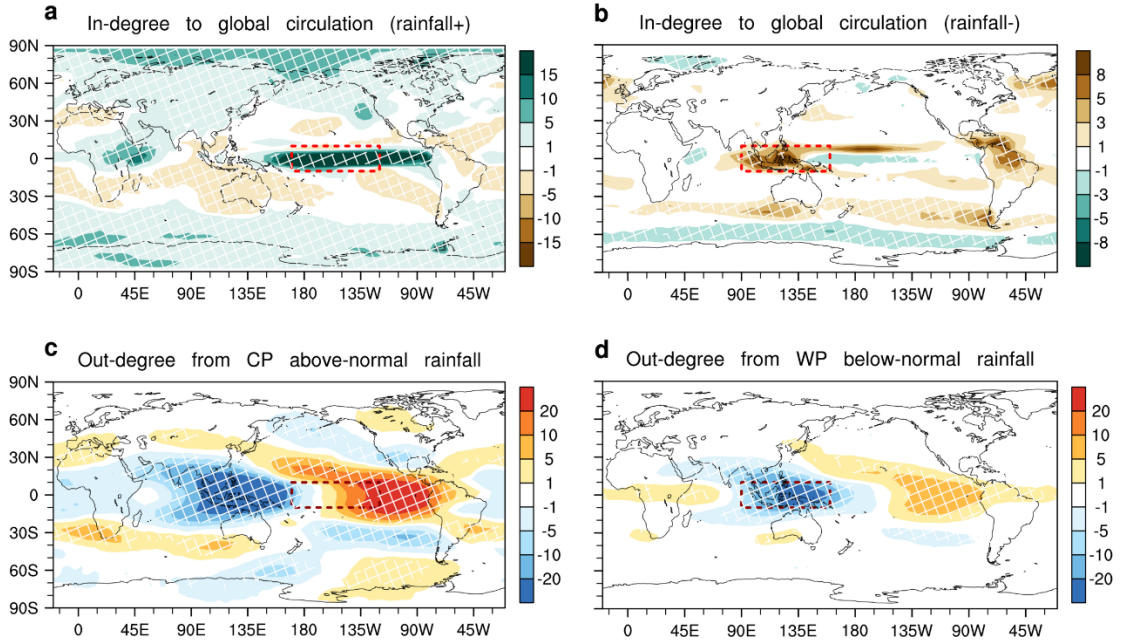

**Figure S6. Projected long-term changes in degree centrality relevant for global atmospheric circulation variations and for equatorial Pacific anomalous rainfall by CMIP6 models under the SSP245 scenario.** Projected long-term changes are calculated as the differences between the period 2070–2099 under the SSP245 scenario and the period 1981–2010 under the historical simulations. Projected changes of in-degree centrality to global anomalous pressure events (units:  $\times 1,000$ ) summed for (a) two networks based on above-normal rainfall events, and (b) two networks based on below-normal rainfall events. Projected changes in out-degree centrality differences (shadings; units:  $\times 100$ ) between networks based on high-pressure events and low-pressure events, from (c) above-normal rainfall events over the equatorial central Pacific, and from (d) below-normal rainfall events over the equatorial western Pacific. Hatched areas in (a–d) show where at least 18 models ( $> 81\%$  of the total 22 models) project the changes with same signs. Equatorial western Pacific ( $10^{\circ}\text{S}$ – $10^{\circ}\text{N}$ ,  $90^{\circ}$ – $160^{\circ}\text{E}$ ) and equatorial central Pacific ( $10^{\circ}\text{S}$ – $10^{\circ}\text{N}$ ,  $170^{\circ}\text{E}$ – $120^{\circ}\text{W}$ ) are outlined by the

118 colored boxes in **(a–d)**. The 22 models for the SSP245 scenario are as same as those  
119 under the SSP 585 scenario, but not including HadGEM3-GC31-MM.  
120

Future changes (SSP585 2036-2065 minus Hist 1981-2010)

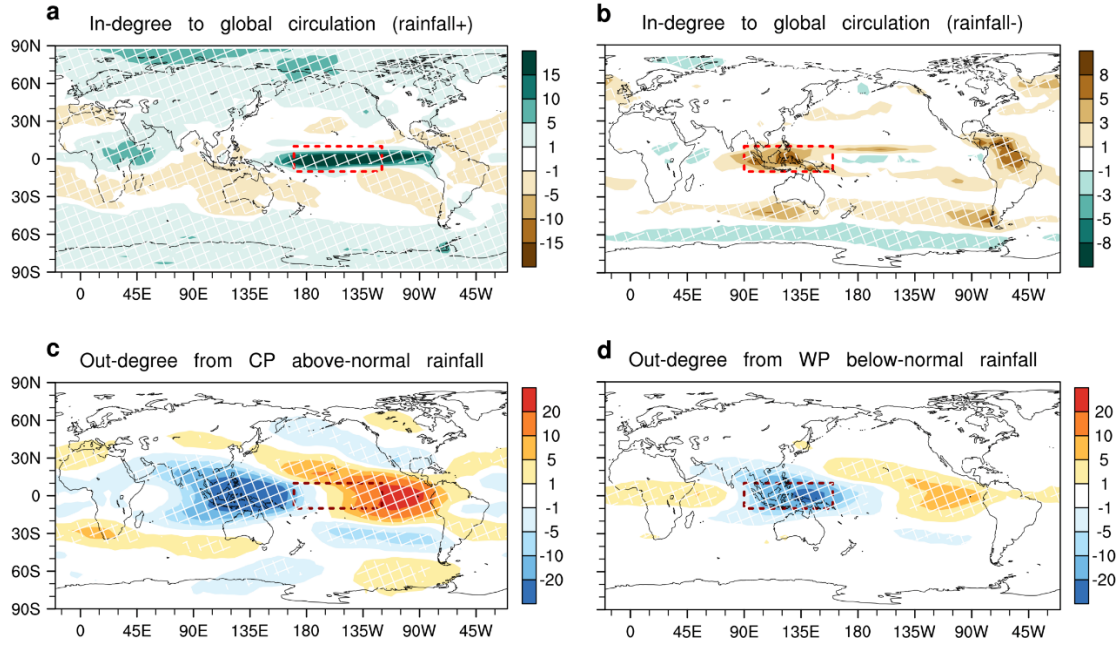

**Figure S7. Projected mid-term changes in degree centrality relevant for global atmospheric circulation variations and for equatorial Pacific anomalous rainfall by CMIP6 models.** Projected mid-term changes are calculated as the differences between the period 2036–2065 under the SSP585 scenario and the period 1981–2010 under the historical simulations. Projected changes of in-degree centrality to global anomalous pressure events (units:  $\times 1,000$ ) summed for **(a)** two networks based on above-normal rainfall events, and **(b)** two networks based on below-normal rainfall events. Projected changes in out-degree centrality differences (shadings; units:  $\times 100$ ) between networks based on high-pressure events and low-pressure events, from **(c)** above-normal rainfall events over the equatorial central Pacific, and from **(d)** below-normal rainfall events over the equatorial western Pacific. Hatched areas in **(a–d)** show where at least 19 models ( $> 82\%$  of the total 23 models) project the changes with same signs. Equatorial western Pacific ( $10^{\circ}\text{S}$ – $10^{\circ}\text{N}$ ,  $90^{\circ}$ – $160^{\circ}\text{E}$ ) and equatorial central Pacific ( $10^{\circ}\text{S}$ – $10^{\circ}\text{N}$ ,  $170^{\circ}\text{E}$ – $120^{\circ}\text{W}$ ) are outlined by the colored boxes in **(a–d)**.
